# Supplementary material for: Energetic costs of performance in trained and untrainedAnolis carolinensislizards
Source: Oxford University Press journal article supplement (doi:10.1242/jeb.176867), 2018-01-01
Supplement: jeb176867supp.pdf [file jeb176867supp.pdf]

**Table S1:** Results of final endurance trials in terms of time and distance for control, sprint-trained, and endurance-trained male and female *Anolis carolinensis*. All values are means ( $\pm$  1 SD).

| (a)#Males   |           |             |                |                |
|-------------|-----------|-------------|----------------|----------------|
|             | Treatment | Time (min)  | Distance (m)   | Recovery (min) |
|             | Control   | 3.49 (0.97) | 176.26 (49.1)  | 7.46 (4.76)    |
|             | Sprint    | 7.17 (3.12) | 360.6 (157.5)  | 22.38 (7.3)    |
|             | Endurance | 8.1 (4.4)   | 409.1 (222.64) | 15.35 (3.9)    |
| (b)#Females |           |             |                |                |
|             | Control   | 3.14 (1.24) | 158.42 (62.5)  | 8.15 (4.06)    |
|             | Sprint    | 5.23 (1.49) | 264.14 (75.1)  | 21.6 (8.8)     |
|             | Endurance | 5.62 (2.38) | 284 (120)      | 12.83 (5.38)   |

**Table S2:** Minimal CO<sub>2</sub> production during both active (RMR) and inactive periods (SMR), as well as the difference between peak VCO<sub>2</sub> following exercise and RMR (i.e.  $\Delta$ RMR) and SMR ( $\Delta$ SMR) respectively for control, sprint-trained, and endurance-trained (a) male and (b) female *Anolis carolinensis*. All values have units of ml CO<sub>2</sub>/hr, and are shown as means ( $\pm$  1 SD).

| (a)#Males   |             |             |              |              |
|-------------|-------------|-------------|--------------|--------------|
| Treatment   | RMR         | SMR         | $\Delta$ RMR | $\Delta$ SMR |
| Control     | 1.55 (0.36) | 0.87 (0.6)  | 3.59 (1.96)  | 4.26 (2.18)  |
| Sprint      | 0.73 (0.36) | 0.59 (0.47) | 4.14 (1.35)  | 4.28 (1.41)  |
| Endurance   | 0.74 (0.6)  | 0.41 (0.38) | 4.57 (1.33)  | 4.9 (0.97)   |
| (b)#Females |             |             |              |              |
| Control     | 0.8 (0.39)  | 0.4 (0.31)  | 1.81 (0.55)  | 2.22 (0.87)  |
| Sprint      | 0.3 (0.33)  | 0.23 (0.2)  | 3.5 (0.93)   | 3.58 (1.17)  |
| Endurance   | 5.62 (0.35) | 0.24 (0.2)  | 2.83 (0.88)  | 3.07 (0.97)  |

**Table S3:** Best-fitting models describing the variation in (a) (mass-specific metabolic rate)<sup>0.4</sup>, and (b) ( $\Delta$  mass-specific MR)<sup>0.45</sup>. The baseline category for MR type is RMR, and that for Treat is control (C). Thus, the reported values give estimated change in the dependent variable between the category named in the table and the baseline category. Bold values indicate significant ( $P < 0.05$ ) estimates.

| (a) (MR/mass) <sup>0.4</sup>            | Model term            | Coefficient | SE    | d.f | t value | P value          |
|-----------------------------------------|-----------------------|-------------|-------|-----|---------|------------------|
|                                         | Intercept             | 0.61        | 0.032 | 35  | 19.17   | <b>&lt;0.001</b> |
|                                         | MR type(smr)          | -0.12       | 0.032 | 35  | -3.75   | <b>&lt;0.001</b> |
|                                         | Treat(E)              | -0.11       | 0.039 | 33  | -2.72   | <b>0.01</b>      |
|                                         | Treat(S)              | -0.12       | 0.039 | 33  | -2.98   | <b>0.005</b>     |
| (b) ( $\Delta$ MR/mass) <sup>0.45</sup> |                       |             |       |     |         |                  |
|                                         | Intercept             | 0.9         | 0.066 | 33  | 13.81   | <b>&lt;0.001</b> |
|                                         | Sex (m)               | -0.11       | 0.064 | 32  | -1.77   | 0.08             |
|                                         | MR type(smr)          | 0.09        | 0.026 | 33  | 3.6     | <b>0.001</b>     |
|                                         | Treat(E)              | 0.24        | 0.08  | 32  | 2.98    | <b>0.005</b>     |
|                                         | Treat(S)              | 0.31        | 0.08  | 32  | 3.88    | <b>&lt;0.001</b> |
|                                         | MR type(smr):Treat(E) | -0.039      | 0.036 | 33  | -1.1    | 0.278            |
|                                         | MR type(smr):Treat(S) | -0.08       | 0.036 | 33  | -2.18   | <b>0.036</b>     |

## Figures

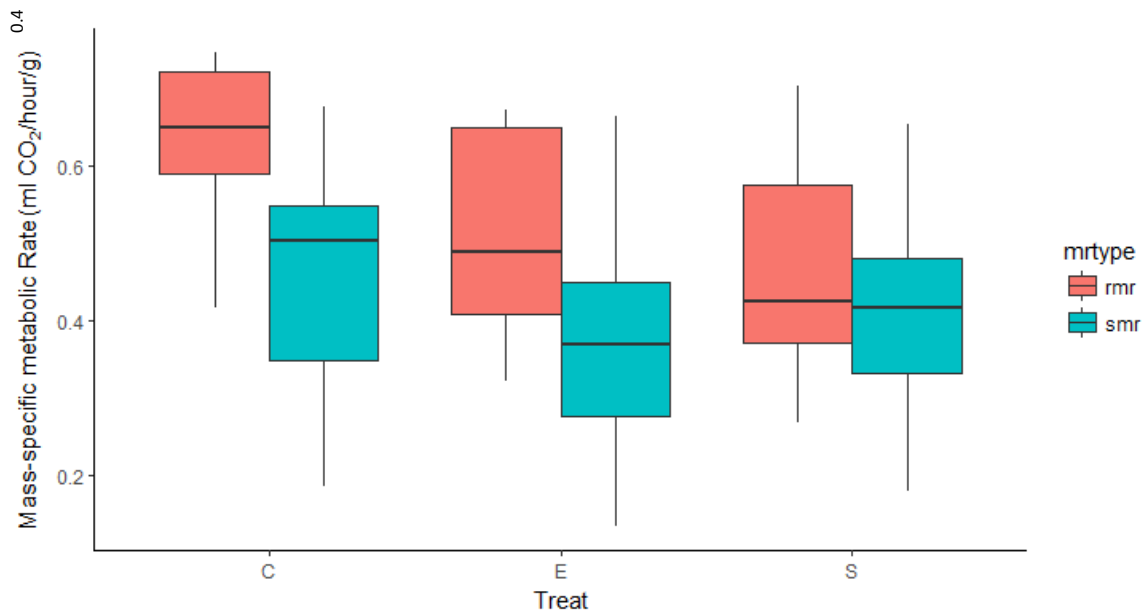

**Fig. S1. Influence of MR type and training treatment on mass-specific MR<sup>0.4</sup>.** Mass-specific MR is higher in control lizards compared to endurance- or sprint-trained lizards. RMR is higher than SMR overall.

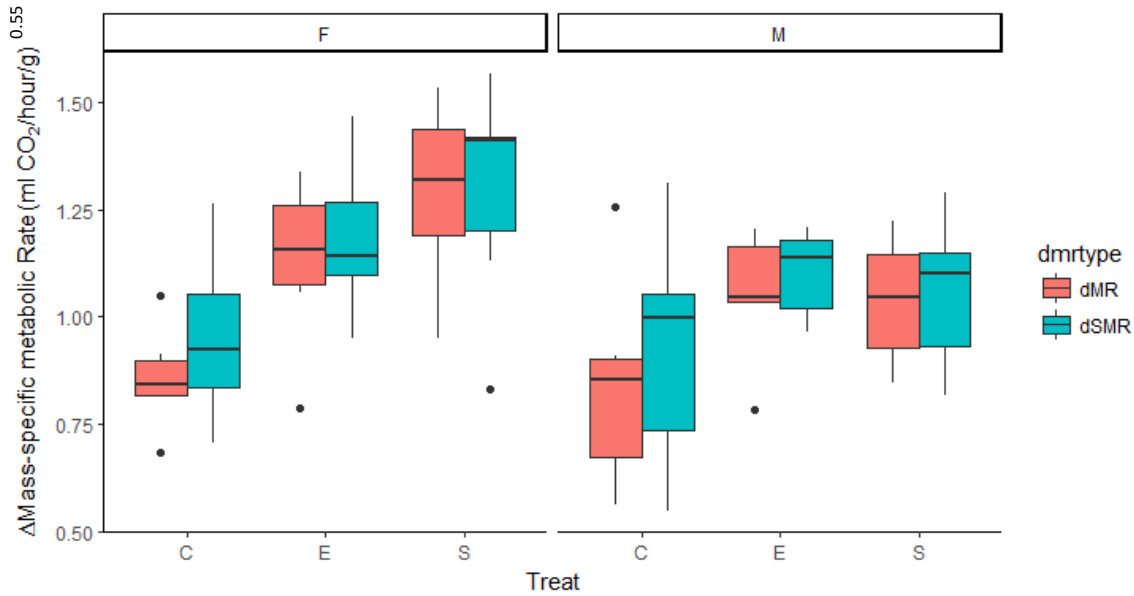

**Fig. S2. Influence of MR type, and training treatment on ( $\Delta$  mass-specific MR)<sup>0.55</sup>.** The greatest change in mass-specific MR was observed in sprint-trained lizards when comparing their SMR with their post-exercise peak MR, whereas the change in mass-specific MR of endurance trained lizards was not different from that of controls. The model also retained a sex effect whereby the mass-specific MRs of males changed less than those of females.
